# Supplementary material for: Spontaneous MXene monolayer assembly at the liquid–air interface
Source: Royal Society of Chemistry journal article supplement (doi:10.1039/c9nr00525k), 2019-01-01
Supplement: c9nr00525k1.pdf [file c9nr00525k1.pdf]

SUPPLEMENTARY INFORMATION

**Spontaneous MXenes monolayer assembly at liquid-air interface**

D.I. Petukhov<sup>a,b,\*</sup>, A.P. Chumakov<sup>c</sup>, A.S. Kan<sup>a</sup>, V.A. Lebedev<sup>a</sup>, Artem A. Eliseev<sup>a,b</sup>, O. Konovalov<sup>c</sup>, Andrei A. Eliseev<sup>b</sup>

<sup>a</sup> Department of Materials Science, Lomonosov Moscow State University, 1-73 Leninskiye gory, Moscow, 119991, Russia,

<sup>b</sup> Department of Chemistry, Lomonosov Moscow State University, Leninskiye gory 1-3, Moscow, 119991, Russia

<sup>c</sup> ESRF - The European Synchrotron. 71, Avenue des Martyrs, 38043 Grenoble, France

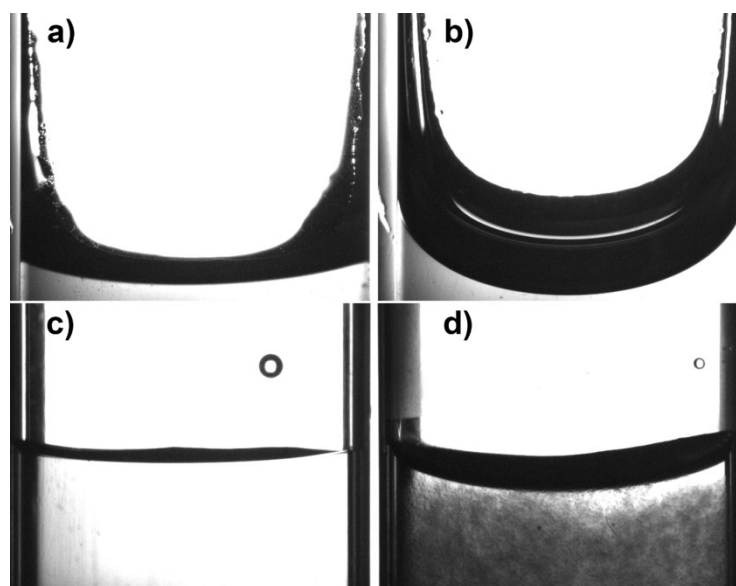

SI 1. Photographs of MXene suspensions with pH = 8 (a, c) and pH < 1 (b, d) in quartz (a, b) and PMMA (c, d) cuvettes.

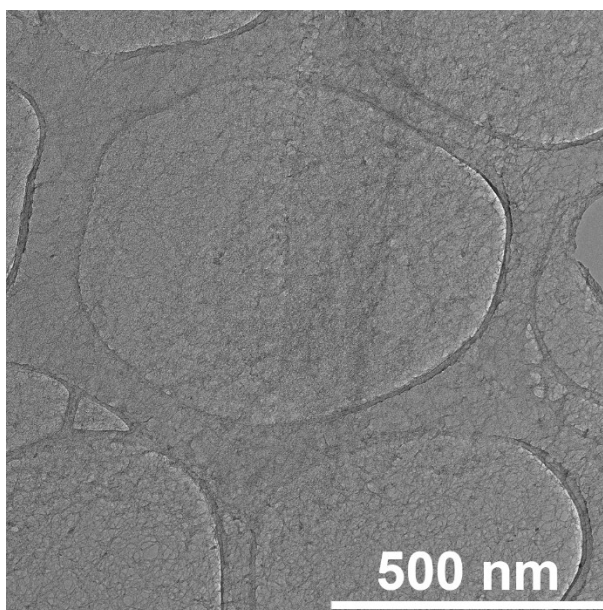

SI 2. Low resolution TEM image of continuous MXene film formed on lacey carbon microscopy grid.

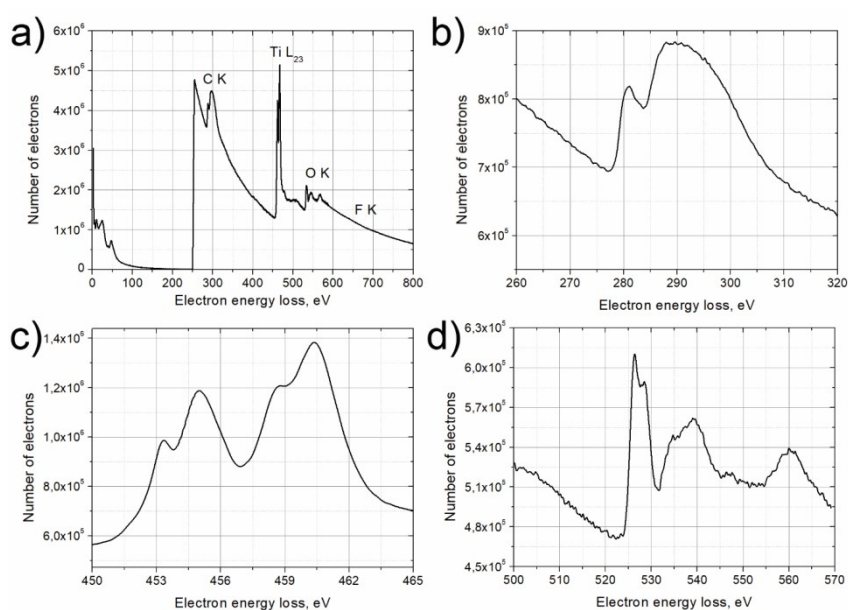

SI 3. EELS survey spectrum and high-resolution spectra for Ti-L, C-K, and O-K edge regions. Data illustrates preferred coordination of titanium to oxygen atoms, while revealing only residues of fluorine and poor Ti-C binding (~10% of total titanium in the sample). Note some carbon signal can be originated from lacey carbon TEM grid.

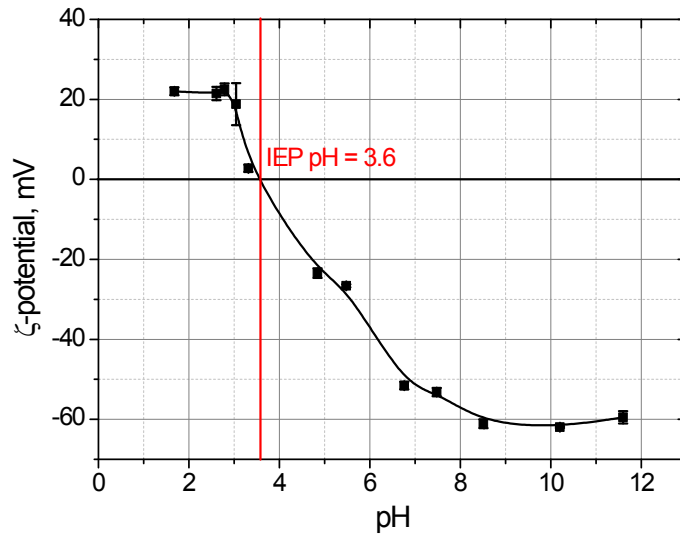

SI. 4. Zeta potential dependence of MXene particles vs. pH of the suspension.

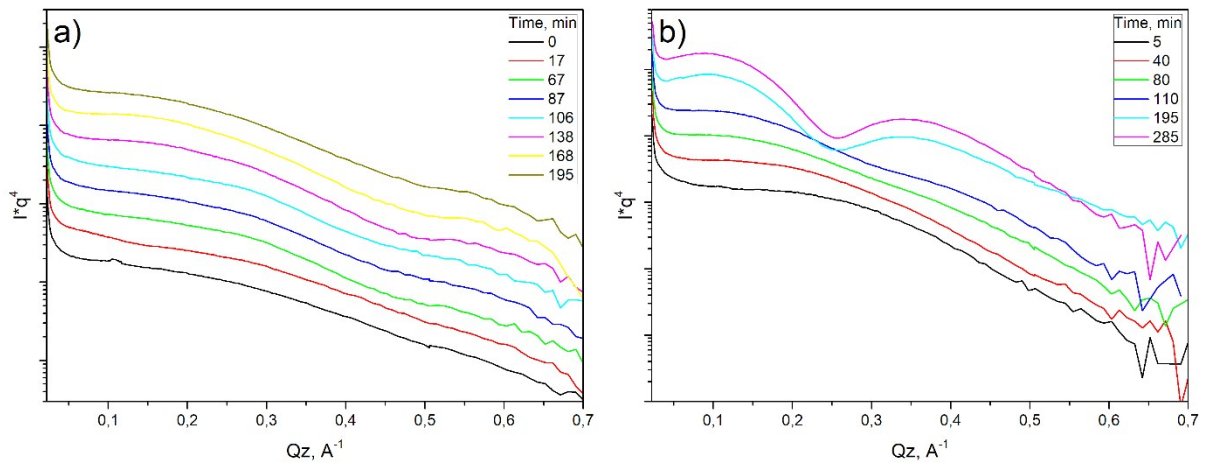

SI 5. XRR spectra time series of liquid-air interface for basic (pH = 8, a) and acidic (pH < 1, b) suspensions. Curves are shifted by multiplying a factor of 2 for clarity.

SI 6. Derived XRR fit parameters for modeled surface layers: thickness (d), roughness ( $\sigma$ ), maximum scattering length density (SLD) of surface layers and calculated surface coverage for XRR spectra series acquired at liquid-air interfaces on basic (pH = 8) and acidic (pH < 1) suspensions of MXenes as well as DOTAB/ $\text{Ti}_3\text{C}_2\text{T}_x$ /subphase interface. Theoretical SLDs for MXenes monolayer and experimental best-fit parameters for pure water and DOTAB/water are given for reference.

| Sample                | Time (min) | Layer | D (Å) | Sigma | SLD   | Surface coverage (%) |
|-----------------------|------------|-------|-------|-------|-------|----------------------|
| Water                 | -          | -     | inf   | 2.98  | 0.410 | -                    |
| DOTAB                 | -          | tails | 12.23 | 4.12  | 0.367 | -                    |
|                       |            | heads | 3.14  | 5.26  | 0.451 | -                    |
| Mxenes (theory)       | -          | -     | -     | -     | 0.966 | 100.0                |
| MXenes pH = 8 + DOTAB | -          | tails | 16.36 | 6.2   | 0.285 | -                    |
|                       |            | heads | 5.48  | 2.6   | 0.577 | -                    |
|                       |            | MXene | 15.28 | 11.1  | 0.383 | 49.1                 |
| MXenes pH = 8         | 0          | MXene | 15.16 | 3.07  | 0.423 | 54.2                 |

|               |       |       |       |       |       |      |
|---------------|-------|-------|-------|-------|-------|------|
|               | 17    |       | 15.31 | 3.11  | 0.421 | 53.9 |
|               | 67    |       | 15    | 3.23  | 0.431 | 55.2 |
|               | 87    |       | 15.48 | 3.24  | 0.431 | 55.2 |
|               | 106   |       | 15.42 | 3.24  | 0.432 | 55.3 |
|               | 138   |       | 15.16 | 3.36  | 0.437 | 56.0 |
|               | 168   |       | 15.8  | 3.41  | 0.442 | 56.6 |
|               | 195   |       | 15.45 | 3.3   | 0.433 | 55.5 |
| Mxenes pH < 1 | 5     | MXene | 8.8   | 3.1   | 0.381 | 48.7 |
|               |       | anion | 9.1   | 6.06  | 0.602 | -    |
|               | 40    | MXene | 11.33 | 3.16  | 0.422 | 54.0 |
|               |       | anion | 8.77  | 5.68  | 0.618 | -    |
|               | 80    | MXene | 13.71 | 3.08  | 0.446 | 57.1 |
|               |       | anion | 8.61  | 6.07  | 0.648 | -    |
|               | 110   | MXene | 13.04 | 2.89  | 0.483 | 61.9 |
|               |       | anion | 7.21  | 5.68  | 0.633 | -    |
|               | 195   | MXene | 13.52 | 3.23  | 0.695 | 89.0 |
|               |       | anion | 4.95  | 7.91  | 1.103 | -    |
| 285           | MXene | 13.28 | 3.94  | 0.750 | 96.1  |      |
|               | anion | 3.02  | 7.37  | 1.354 | -     |      |

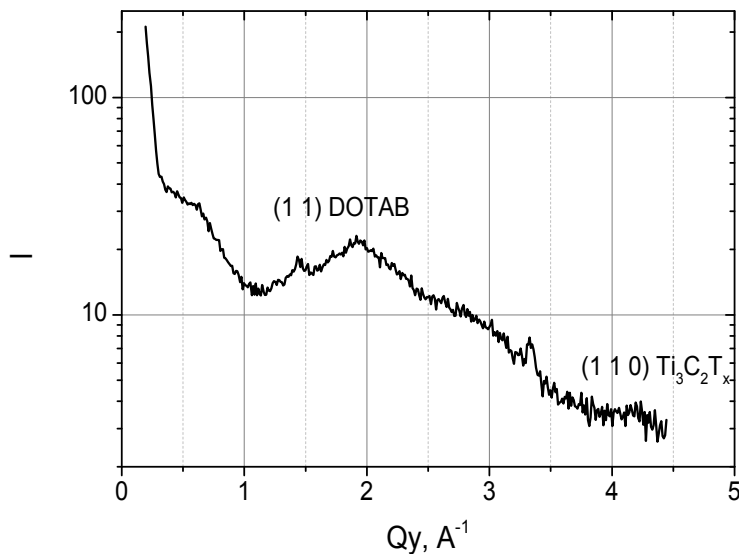

SI 7. Grazing incidence ( $\mu = 0.05^\circ$ ) X-ray diffraction (GIXRD) pattern for DOTAB/ $\text{Ti}_3\text{C}_2\text{T}_x$ /subphase interface at out-of-plane reflection angle  $\theta = 0..0.1^\circ$  and variable in-plane ( $\delta$ ) reflection angle. GIXRD indicates both in-plane assembly of DOTAB molecules and  $\text{Ti}_3\text{C}_2\text{T}_x$  diffraction maximum at  $\sim 4.2 \text{ \AA}^{-1}$  ( $\sim 1.5 \text{ \AA}$ ), corresponding to (110)  $\text{Ti}_3\text{C}_2\text{T}_x$  lattice reflection. Large width of MXene reflection is indicative for poor periodicity. As the reflection appears in  $q_y$  direction corresponding diffracting planes are strictly perpendicular to the plane of the film corresponding to in-plane texturing. Note the appearance of the diffraction maximum in the GIXRD geometry with an angle of incidence below critical angle, correspond to diffracting planes laying strictly in the surface layer.

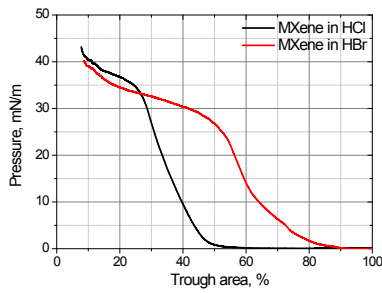

SI. 8. Surface layer compression isotherms of MXenes suspensions at pH < 1 on HCl and HBr solutions.

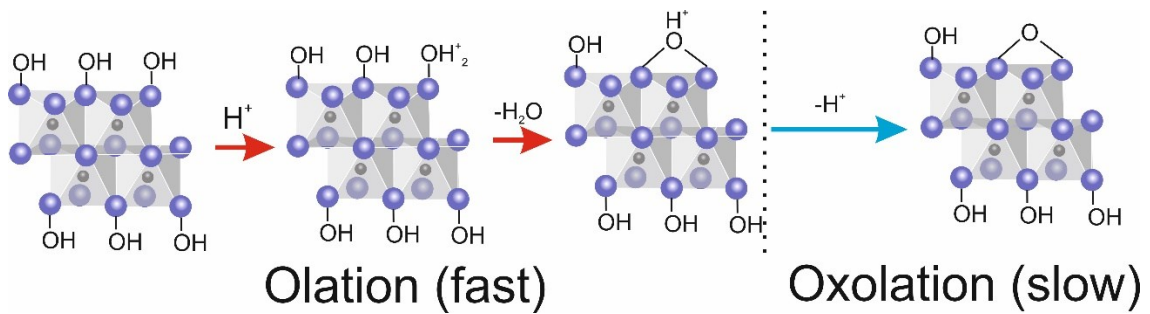

SI. 9 Scheme of olation and oxolation process on MXenes flakes.

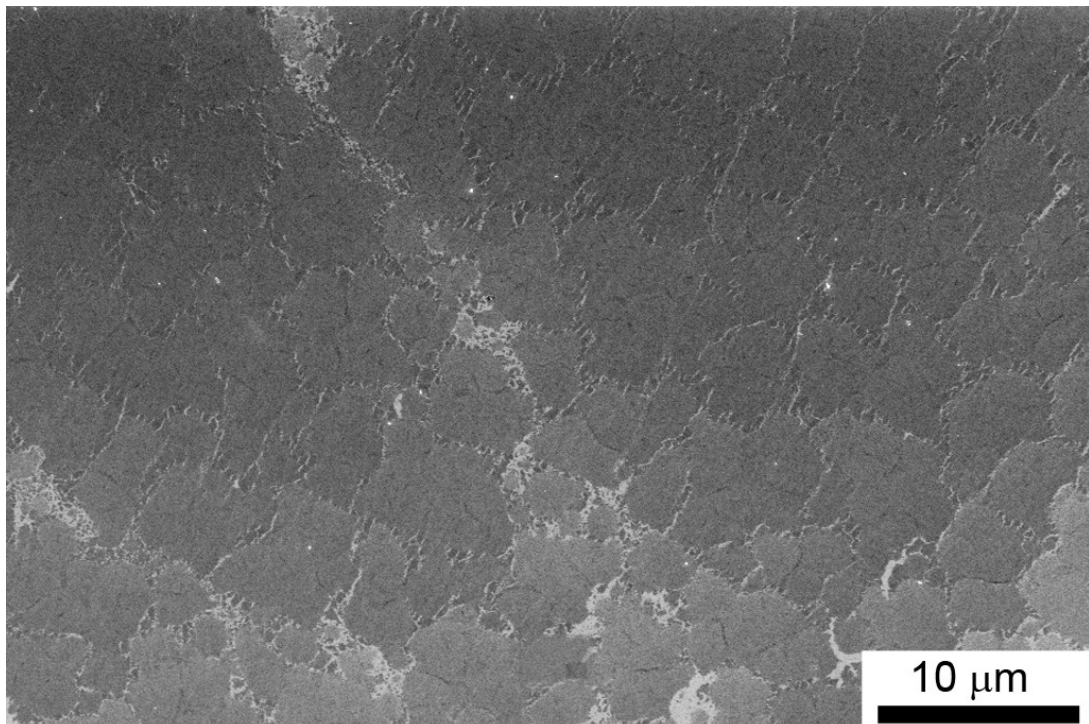

SI. 10 Low magnification SEM image for MXene films formed at liquid-air interface from acidic suspension at the surface tension  $\sigma=20\text{ mN/m}$  and compression degree of  $\sim 2.5$  transferred onto silicon substrates by Langmuir-Blodgett method demonstrating uniform coverage on a large area.

SI. 11 Panoramic XPS spectrum and Spectra for Ti2p, C1s and O1s regions for MXene film transferred on silicon substrate

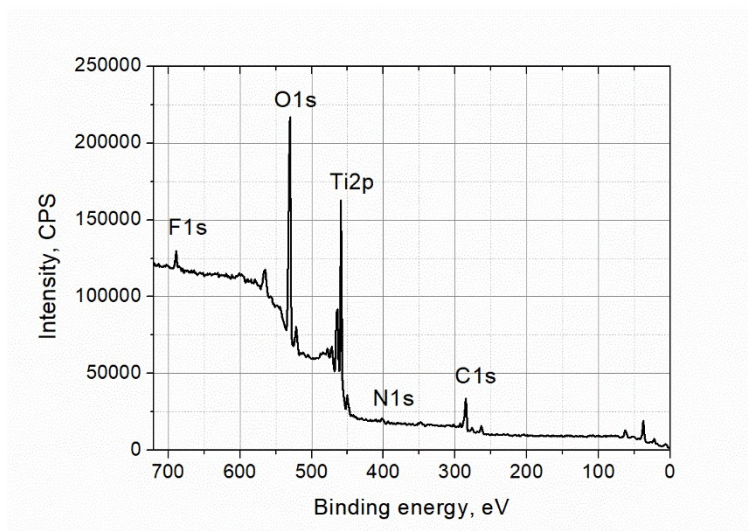

Overall formal chemical composition:

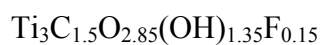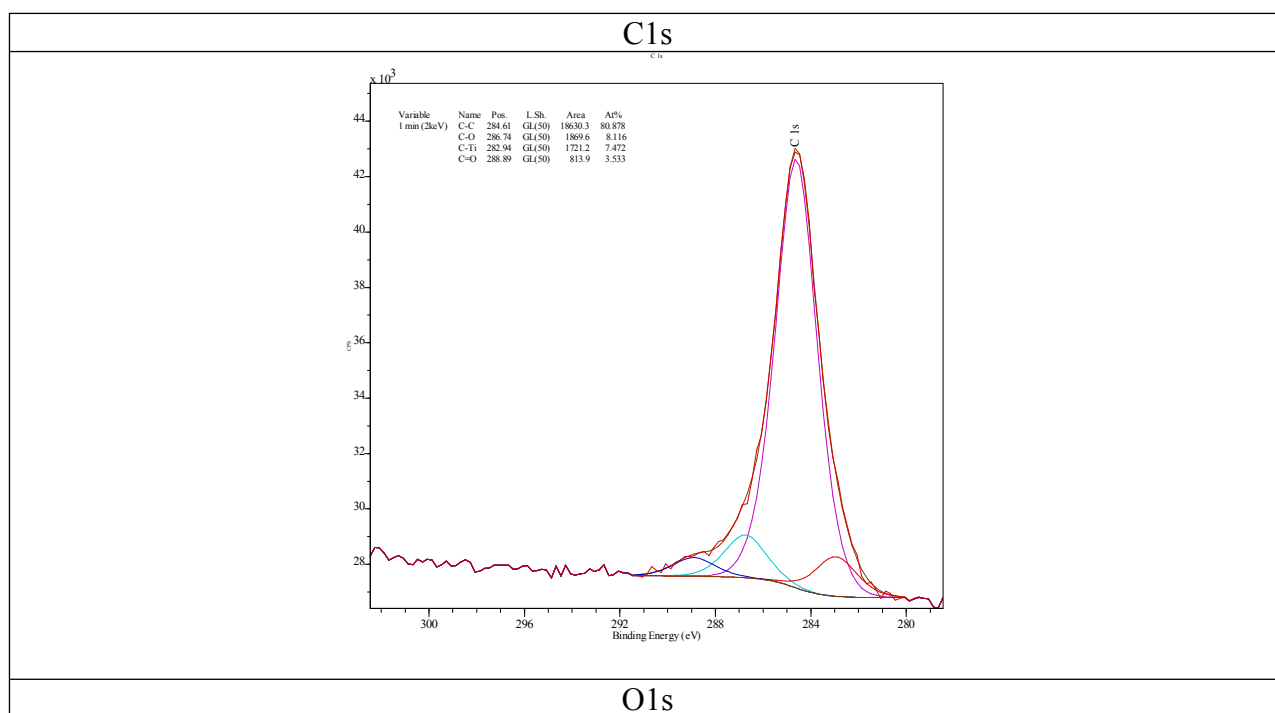

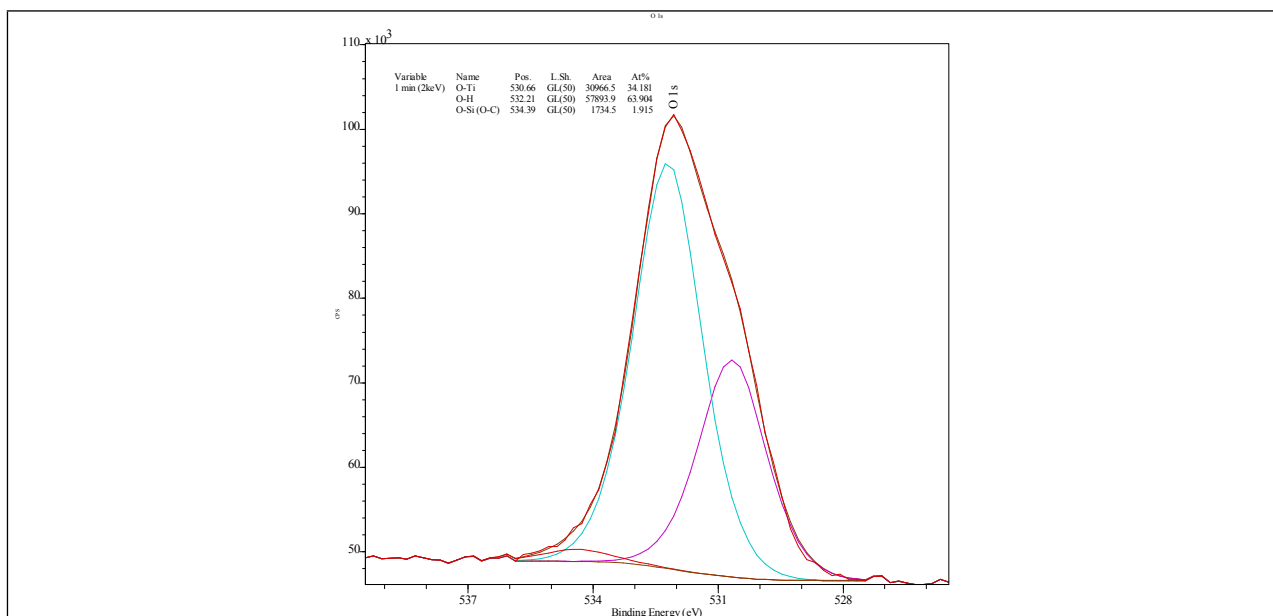

Ti2p

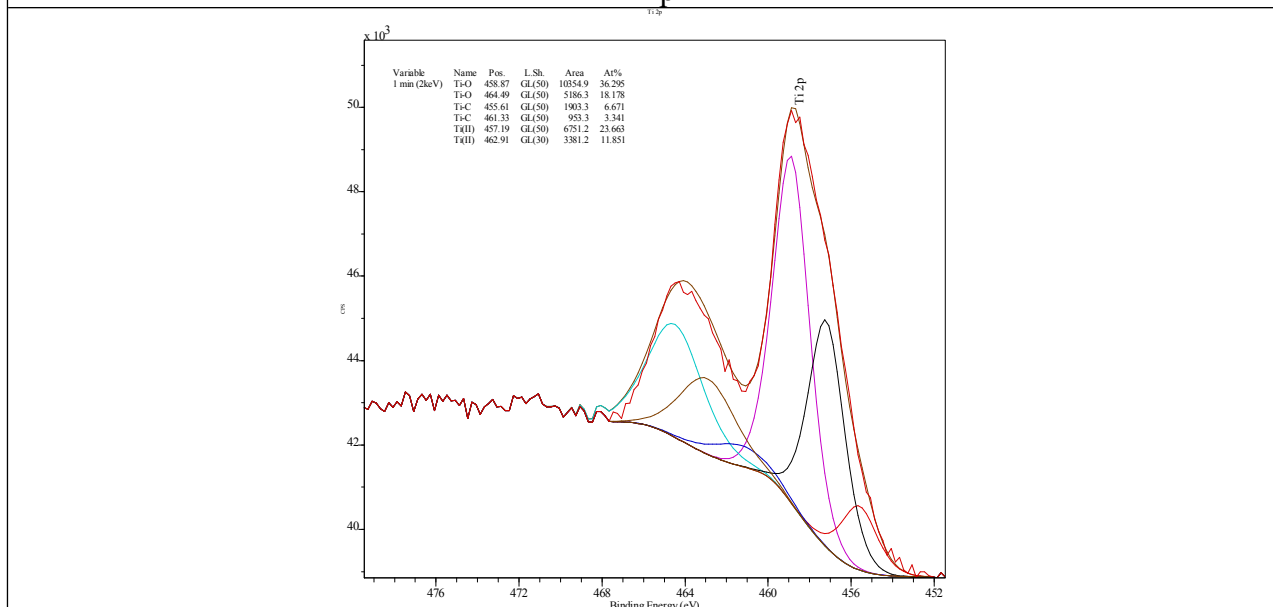

### Deconvolution of C1s spectra

|       | C-C   | C-O   | C=O   | C-Ti  |
|-------|-------|-------|-------|-------|
| E, eV | 284.6 | 286.7 | 288.9 | 282.9 |
| c, %  | 80.89 | 8.12  | 3.53  | 7.47  |

### Deconvolution of O1s spectra

|       | Ti-O   | O-H    | H <sub>2</sub> O |
|-------|--------|--------|------------------|
| E, eV | 530.75 | 531.95 | 533.13           |
| c, %  | 29.31  | 61.23  | 9.46             |

### Deconvolution of Ti2p spectra

|       | Ti-O (4+) | Ti-O (2+) | Ti-C  | Ti-O (4+) | Ti-O (3+) | Ti-C  |
|-------|-----------|-----------|-------|-----------|-----------|-------|
| E, eV | 458.9     | 457.2     | 455.6 | 464.5     | 462.9     | 461.3 |
| c, %  | 54.5      | 35.5      | 10.0  |           |           |       |
